# Supplementary material for: Potential KPC‐2 carbapenemase reservoir of environmental Aeromonas hydrophila and Aeromonas caviae isolates from the effluent of an urban wastewater treatment plant in Japan
Source: PubMed Central journal article supplement — Environ Microbiol Rep. 2019 May 31;11(4):589–97. doi: 10.1111/1758-2229.12772 (PMC6851574; doi:10.1111/1758-2229.12772), 2019-05-31
Supplement: EMI4-11-589-s002.pdf [file EMI4-11-589-s002.pdf]

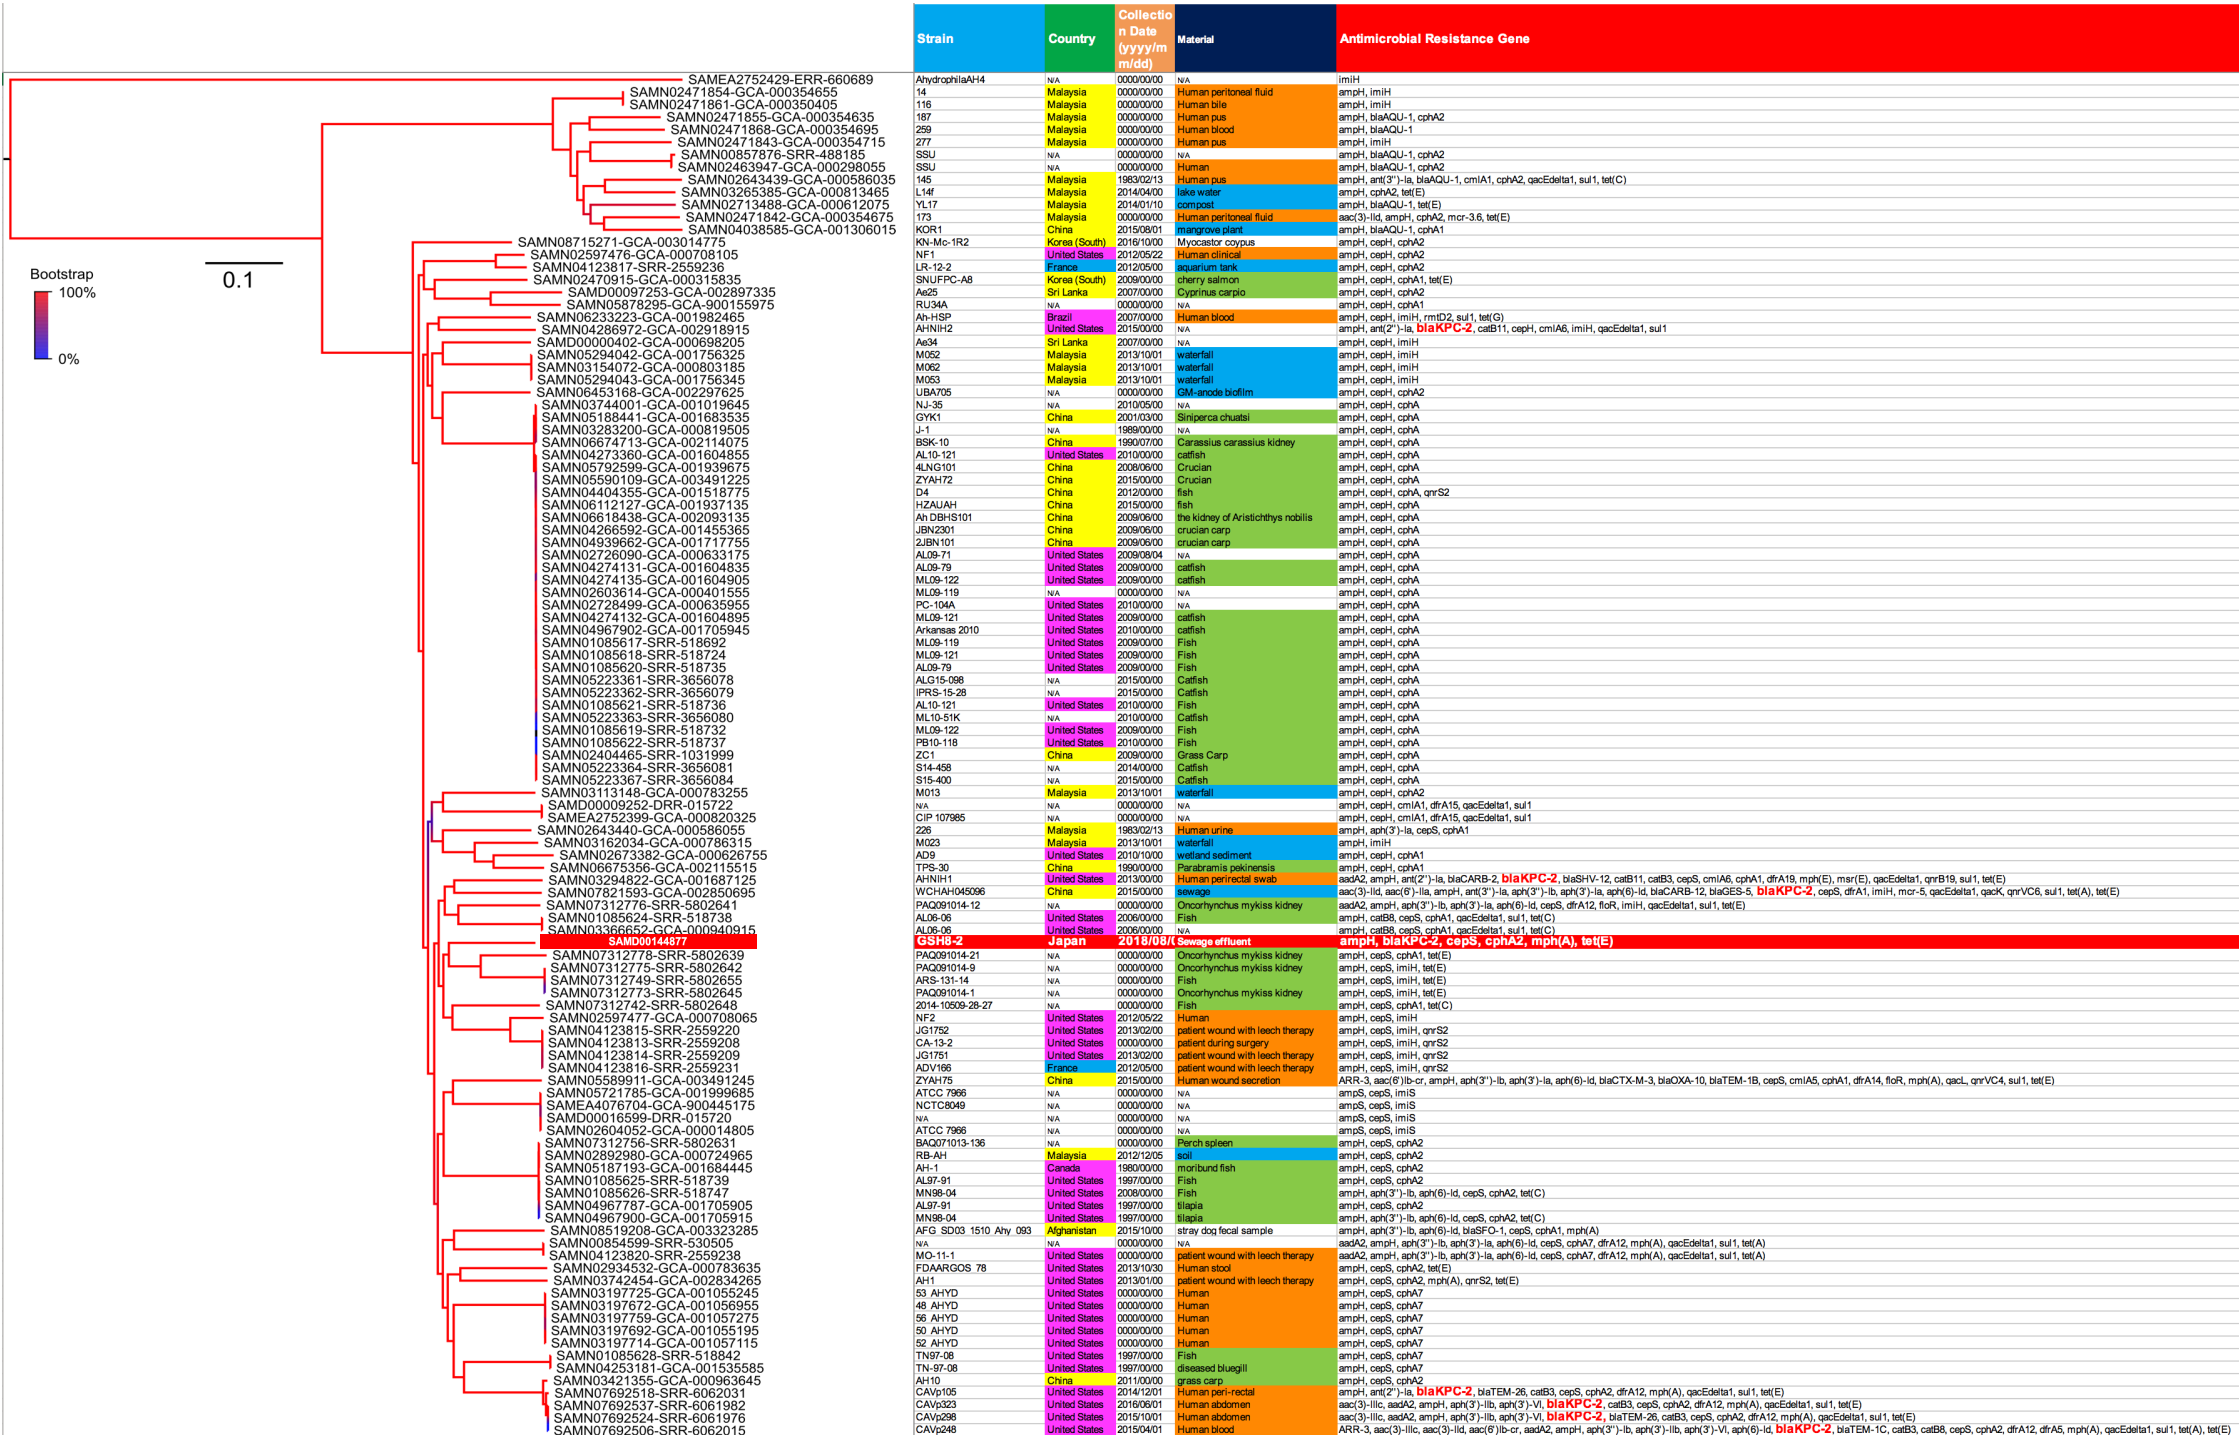

**Fig. S1 Coregenome phylogeny of *Aeromonas hydrophila* GSH8-2 among publicly available 108 strains (updated at 2018/10/29).** Using the complete genome sequence of GSH8-2 (4,962,478 bp), bwa-read mapping analysis identified 48.95% of the full genome as core-genome sequence and a total of 491,764 single nucleotide variations (SNVs) were identified, excluding prophages and repeated regions.
