# Supplementary material for: Potential KPC‐2 carbapenemase reservoir of environmental Aeromonas hydrophila and Aeromonas caviae isolates from the effluent of an urban wastewater treatment plant in Japan
Source: PubMed Central journal article supplement — Environ Microbiol Rep. 2019 May 31;11(4):589–97. doi: 10.1111/1758-2229.12772 (PMC6851574; doi:10.1111/1758-2229.12772), 2019-05-31
Supplement: EMI4-11-589-s003.pdf [file EMI4-11-589-s003.pdf]

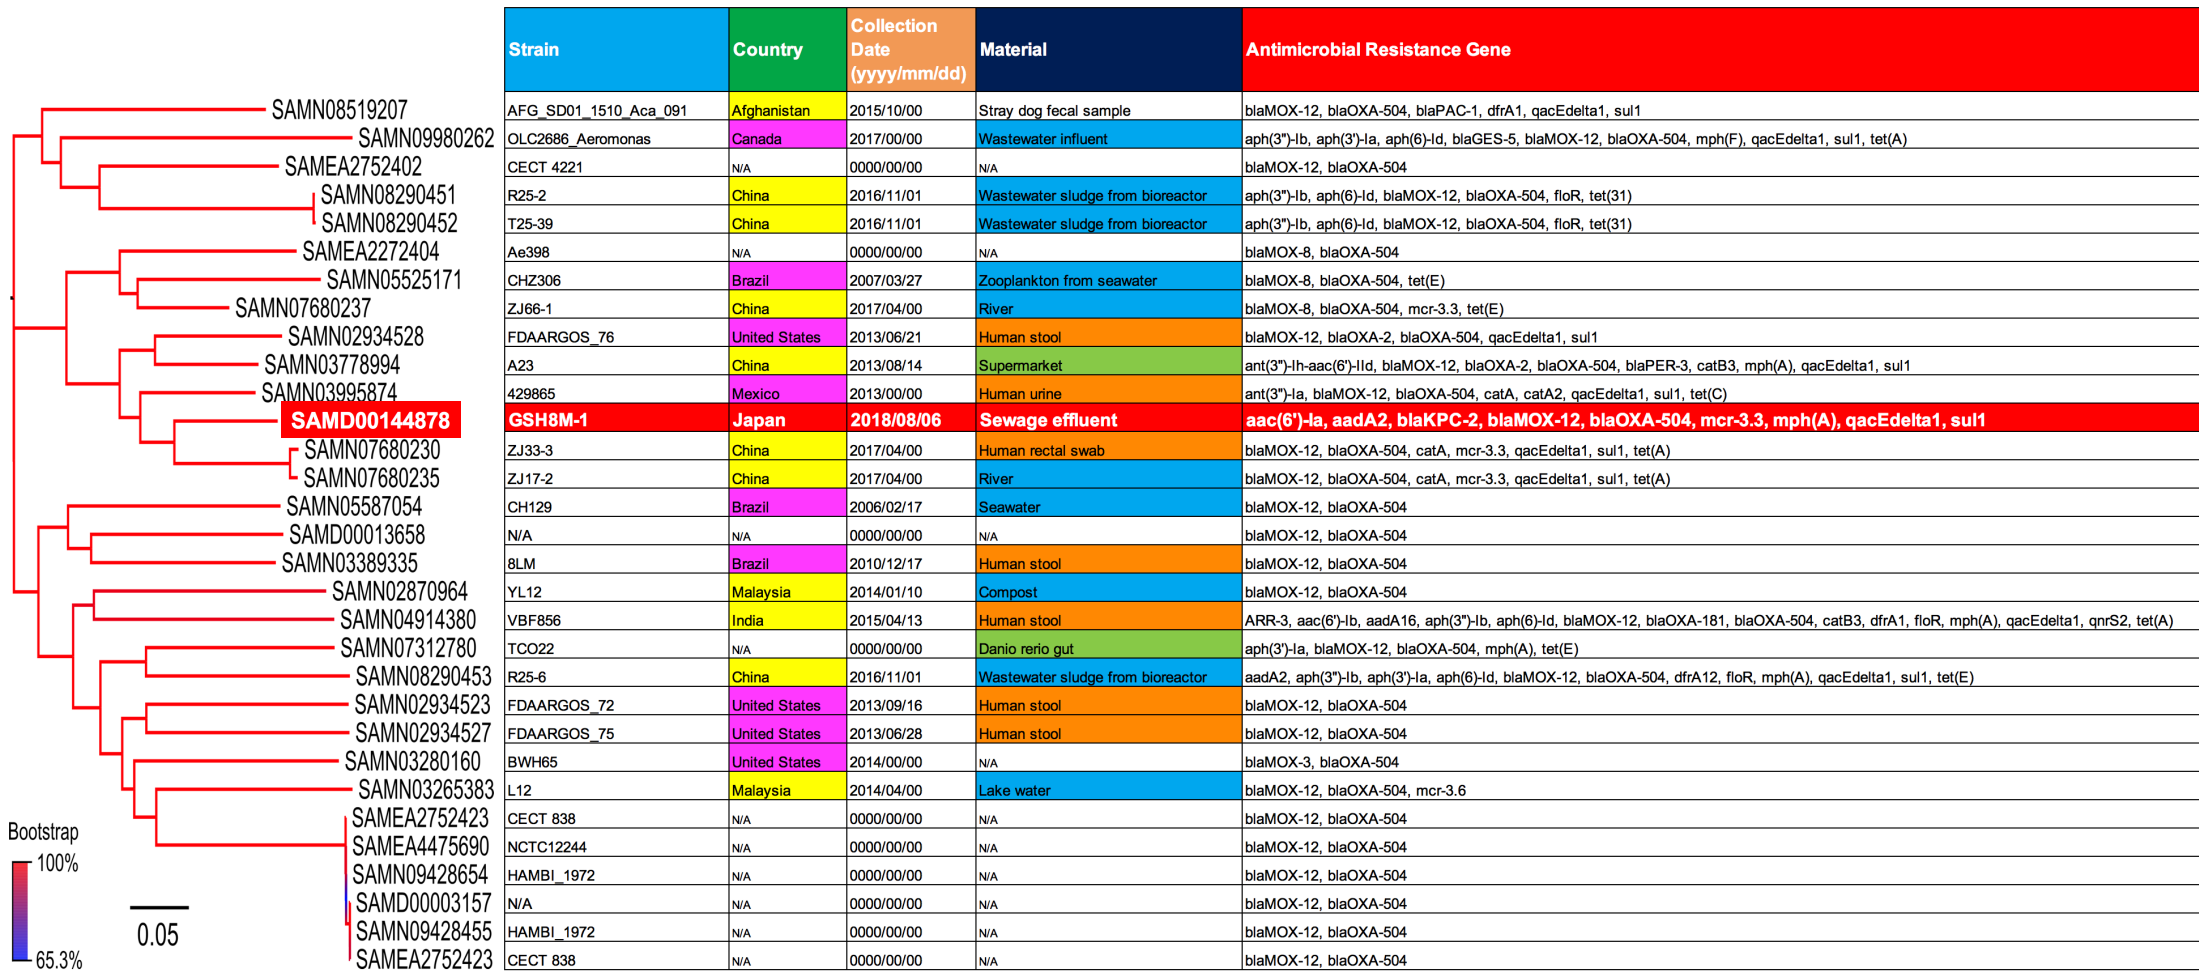

**Fig. S2 Coregenome phylogeny of *Aeromonas caviae* GSH8M-1 among publicly available 30 strains (updated at 2018/10/29).** Using the complete genome sequence of GSH8M-1 (4,611,279 bp), bwa-read mapping analysis identified 70.53% of the full genome as core-genome sequence and a total of 229,493 single nucleotide variations (SNVs) were identified, excluding prophages and repeated regions.
